# Supplementary material for: Tuning optical properties of π-conjugated double nanohoops under external electric field stimuli-responsiveness
Source: Royal Society of Chemistry journal article supplement (doi:10.1039/d3cp05504c), 2024-01-01
Supplement: d3cp05504c1.pdf [file d3cp05504c1.pdf]

## Supporting Information

### Tuning Optical Properties of $\pi$ -Conjugated Double Nano hoops under External Electric Field Stimuli-Responsiveness

Xiao Huang,<sup>a</sup> Ping-yao Gan,<sup>a</sup> Feng-wei Gao,<sup>\*a,b</sup> Zhong-min Su<sup>\*a,c</sup>

<sup>a</sup> School of Chemistry and Environmental Engineering, Changchun University of Science and Technology, 7989 Weixing Road, Changchun 130012, China.

<sup>b</sup> Chongqing Research Institute, Changchun University of Science and Technology, No.618 Liangjiang Avenue, Longxing Town, Yubei District, Chongqing City 401135, China.

E-mail: gaofw@cust.edu.cn

<sup>c</sup> State Key Laboratory of Supramolecular Structure and Materials, Institute of Theoretical Chemistry, College of Chemistry, Jilin University, Changchun 130021, China.

E-mail: zmsu@nenu.edu.cn

#### Table of contents

|                                                                                                                                                                                                                         |     |
|-------------------------------------------------------------------------------------------------------------------------------------------------------------------------------------------------------------------------|-----|
| Figure S1. The FMOs of the [8]CPP-[10]cyclacene under the $F_y$ .                                                                                                                                                       | S2  |
| Figure S2. The FMOs of the [8]CPP-[10]cyclacene under the $F_z$ .                                                                                                                                                       | S3  |
| Figure S3. ESP of the [8]CPP-[10]cyclacene under the $F_y$ and $F_z$ .                                                                                                                                                  | S4  |
| Figure S4. The FMOs of the [8]CPP-[10]cyclacene under the $F_x$ .                                                                                                                                                       | S5  |
| Figure S4. ESP of the [8]CPP-[10]cyclacene under the $F_x$ .                                                                                                                                                            | S6  |
| Table S1. The total energies ( $E_{B3LYP}$ and $E_{UB3LYP}$ , au) of the [8]CPP-[10]cyclacene at the B3LYP and UB3LYP level with 6-31G(d) basis set without/ under the horizontal $F_y$ ( $F_y = 1 \times 10^{-4}$ au). | S7  |
| Table S2. Diradical characters ( $y_0$ and $y_1$ ) for the [8]CPP-[10]cyclacene and [10]C-Ac at the LC-UBLYP/6-31G* level of theory.                                                                                    | S8  |
| Table S3. Evolutions of diradical characters ( $y_0$ and $y_1$ ) under the $F_y$ .                                                                                                                                      | S9  |
| Table S4. Evolutions of diradical characters ( $y_0$ and $y_1$ ) under the $F_z$ .                                                                                                                                      | S10 |
| Table S5. Evolutions of diradical characters ( $y_0$ and $y_1$ ) under the $F_x$ .                                                                                                                                      | S11 |
| Table S6. Cartesian coordinates (Å) for the optimized structure by using the UB3LYP with 6-31G(d) basis set.                                                                                                            | S12 |

## Supporting Information

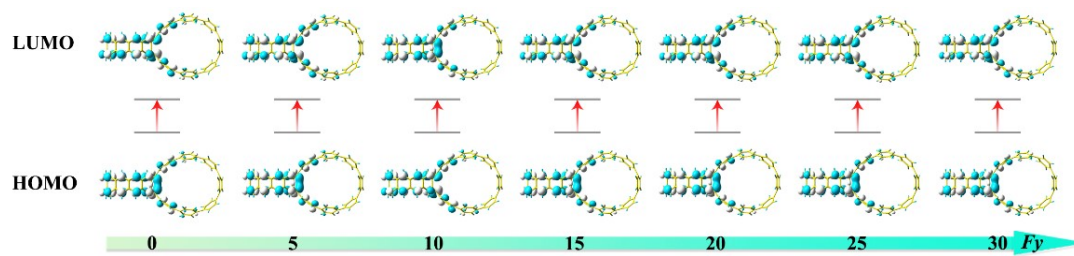

Figure S1. The FMOs of the [8]CPP-[10]cyclacene under the  $F_y$ .

## Supporting Information

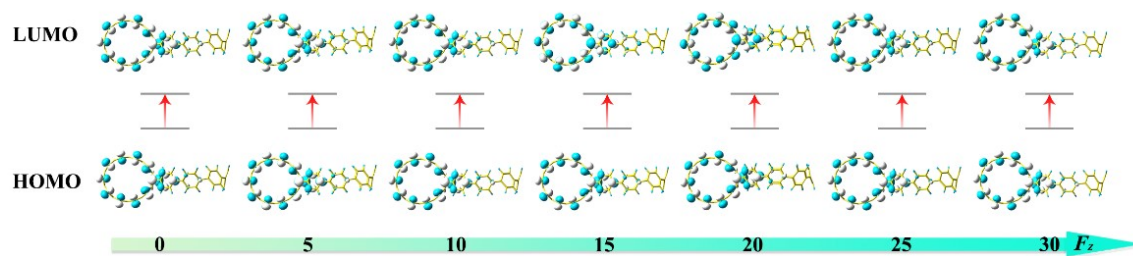

Figure S2. The FMOs of the [8]CPP-[10]cyclacene under the  $F_z$ .

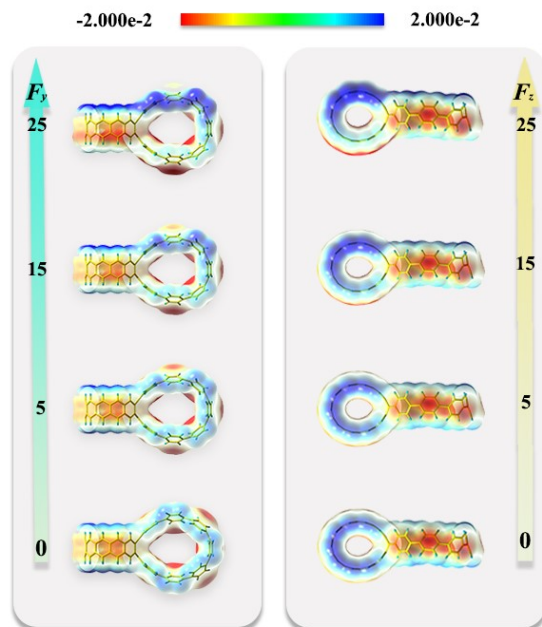

Figure S3. ESP of the [8]CPP-[10]cyclacene under the  $F_y$  and  $F_z$ .

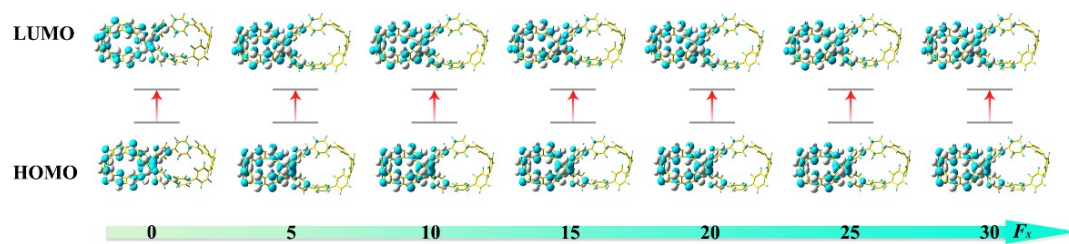

Figure S4. The FMOs of the [8]CPP-[10]cyclacene under the  $F_x$ .

## Supporting Information

---

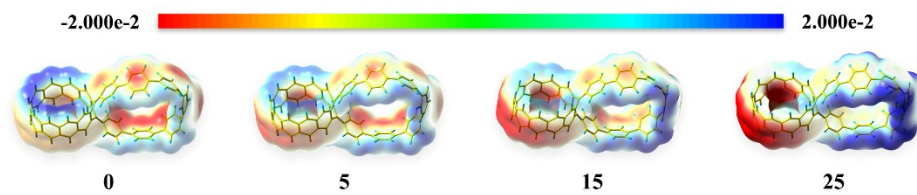

Figure S5. ESP of the [8]CPP-[10]cyclacene under the  $F_x$ .

## Supporting Information

---

Table S1. The total energies ( $E_{\text{UB3LYP}}$  and  $E_{\text{B3LYP}}$ , au) of the [8]CPP-[10]cyclacene at the B3LYP and UB3LYP level with 6-31G(d) basis set without/ under the horizontal  $F_y$  ( $F_y = 1 \times 10^{-4}$  au).

| $F_y \times 10^{-4}$ (au) | $E_{\text{UB3LYP}}$ | $E_{\text{B3LYP}}$ |
|---------------------------|---------------------|--------------------|
| 0                         | -3152.4202          | -3152.4024         |
| 10                        | -3152.4206          | -3152.4031         |
| 20                        | -3152.4049          | -3152.4049         |
| 30                        | -3152.4080          | -3152.4080         |

## Supporting Information

---

Table S2. Diradical characters ( $y_0$  and  $y_1$ ) for the [8]CPP-[10]cyclacene and [10]C-Ac at the LC-UBLYP/6-31G\* level of theory.

| Compound              | $y_0$ | $y_1$ |
|-----------------------|-------|-------|
| [8]CPP-[10]cyclacene  | 0.936 | 0.327 |
| [10]C-Ac <sup>1</sup> | 0.965 | 0.336 |



## Supporting Information

---

The diradical character ( $y_i$ ), associated with HOMO- $i$  and LUMO+ $i$ , is defined based on the weight of the doubly excited configuration within multiconfigurational (MC)-SCF theory. The  $y_i$  is applied within the framework of the spin-unrestricted long-range corrected UBLYP (LC-UBLYP) functional, utilizing the 6-31G(d) basis set.<sup>2</sup> Meanwhile, the range separating parameter  $\mu$  of the LC-BLYP functional is set to 0.33 bohr<sup>-1</sup>. The  $y_i$  is formally expressed as follows:<sup>3, 4</sup>

$$y_i = 1 - 2T_i / (1 + T_i^2) \quad (1)$$

where  $T_i$  is the orbital overlap between the corresponding orbital pairs, which can also be expressed as:

$$T_i = (n_{\text{HOMO-}i} - n_{\text{LUMO-}i}) / 2 \quad (2)$$

Table S3. Evolutions of diradical characters ( $y_0$  and  $y_1$ ) under the  $F_y$ .

| $F_y \times 10^{-4}$ (au) | $y_0$ | $y_1$ |
|---------------------------|-------|-------|
| 0                         | 0.94  | 0.33  |
| 5                         | 0.94  | 0.33  |
| 10                        | 0.94  | 0.33  |
| 15                        | 0.94  | 0.33  |
| 20                        | 0.94  | 0.26  |
| 25                        | 0.94  | 0.26  |
| 30                        | 0.94  | 0.26  |

## Supporting Information

---

Table S4. Evolutions of diradical characters ( $y_0$  and  $y_1$ ) under the  $F_z$ .

| $F_z \times 10^{-4}$ (au) | $y_0$ | $y_1$ |
|---------------------------|-------|-------|
| 0                         | 0.94  | 0.33  |
| 5                         | 0.94  | 0.33  |
| 10                        | 0.94  | 0.33  |
| 15                        | 0.94  | 0.33  |
| 20                        | 0.94  | 0.33  |
| 25                        | 0.93  | 0.26  |
| 30                        | 0.93  | 0.26  |

## Supporting Information

---

Table S5. Evolutions of diradical characters ( $y_0$  and  $y_1$ ) under the  $F_z$ .

| $F_x \times 10^{-4}$ (au) | $y_0$ | $y_1$ |
|---------------------------|-------|-------|
| 0                         | 0.94  | 0.33  |
| 5                         | 0.94  | 0.26  |
| 10                        | 0.93  | 0.26  |
| 15                        | 0.93  | 0.32  |
| 20                        | 0.00  | 0.00  |
| 25                        | 0.59  | 0.58  |
| 30                        | 0.00  | 0.00  |

## Supporting Information

Table S6. Cartesian coordinates (Å) for the optimized structure by using the UB3LYP-D3 with 6-31G(d) basis set.

### Optimized $S_0$ geometry of the [8]CPP-[10]cyclacene

|   |             |             |             |
|---|-------------|-------------|-------------|
| C | 9.03097300  | -6.10263200 | 0.06843800  |
| C | 9.61975200  | -6.69819700 | -1.06595800 |
| H | 8.98898800  | -7.04105900 | -1.88147100 |
| C | 11.00181700 | -6.79132900 | -1.19867100 |
| H | 11.42084600 | -7.19205200 | -2.11816500 |
| C | 11.86298500 | -6.29974500 | -0.19984600 |
| C | 11.27046100 | -5.88746500 | 1.00755700  |
| H | 11.89792600 | -5.50148300 | 1.80528500  |
| C | 9.89121100  | -5.78930100 | 1.13780800  |
| H | 9.48987100  | -5.33243500 | 2.03677200  |
| C | 14.23024000 | -5.78003500 | 0.55179300  |
| H | 14.09093700 | -6.32086000 | 1.48436200  |
| C | 13.26444900 | -5.89200900 | -0.46676400 |
| C | 13.55816700 | -5.27259100 | -1.69421400 |
| H | 12.85121800 | -5.34865400 | -2.51517300 |
| C | 14.62488400 | -4.38916800 | -1.81339600 |
| H | 14.71016300 | -3.80225500 | -2.72273200 |
| C | 15.44782800 | -4.08916000 | -0.71234000 |
| C | 15.30262800 | -4.90146500 | 0.42945500  |
| H | 15.98014300 | -4.77487600 | 1.26985600  |
| C | 15.98728000 | -0.62309900 | 0.50853900  |
| H | 15.72459500 | -0.09802900 | 1.42165400  |
| C | 16.08699400 | 0.08904800  | -0.70037200 |
| C | 16.46022600 | -0.64903200 | -1.84078500 |
| H | 16.65121800 | -0.13226800 | -2.77778000 |
| C | 16.46509800 | -2.04121400 | -1.82355600 |
| H | 16.65970300 | -2.57962800 | -2.74751800 |
| C | 16.09672000 | -2.75338500 | -0.66522800 |
| C | 15.99201400 | -2.01221900 | 0.52568600  |
| H | 15.73276200 | -2.51646700 | 1.45141600  |
| C | 15.42891700 | 1.41872600  | -0.78043400 |
| C | 14.60298700 | 1.68519300  | -1.88784700 |
| H | 14.69151400 | 1.07602500  | -2.78211800 |
| C | 13.53032700 | 2.56403000  | -1.78991800 |
| H | 12.82211700 | 2.61450200  | -2.61175400 |
| C | 13.23349700 | 3.21230600  | -0.57821700 |
| C | 14.20091500 | 3.13267700  | 0.44181100  |
| H | 14.05884400 | 3.69601900  | 1.36053200  |
| C | 15.27919900 | 2.25862200  | 0.34060600  |
| H | 15.95840000 | 2.15795300  | 1.18312400  |
| C | 11.82949200 | 3.61711300  | -0.32019400 |
| C | 10.96452900 | 4.07898700  | -1.32984900 |
| H | 11.38038600 | 4.46024400  | -2.25901600 |
| C | 9.58318300  | 3.98022800  | -1.19374000 |
| H | 8.94957200  | 4.29925400  | -2.01670200 |
| C | 8.99903700  | 3.40816600  | -0.04491600 |
| C | 9.86198200  | 3.12586500  | 1.03086400  |
| H | 9.46418600  | 2.68786800  | 1.94071900  |
| C | 11.24048200 | 3.22984900  | 0.89715300  |

## Supporting Information

---

|   |             |             |             |
|---|-------------|-------------|-------------|
| H | 11.87099200 | 2.86701000  | 1.70327300  |
| C | 7.61688500  | 2.88096100  | -0.03133400 |
| C | 7.03399700  | 2.39853800  | -1.22269100 |
| H | 7.52697500  | 2.58262400  | -2.17237800 |
| C | 5.92402500  | 1.57245200  | -1.20837500 |
| H | 5.58437400  | 1.14219200  | -2.14381800 |
| C | 5.31985600  | 1.15708600  | 0.00994600  |
| C | 5.82855800  | 1.75557000  | 1.19582000  |
| H | 5.40023600  | 1.49022800  | 2.15572200  |
| C | 6.93061800  | 2.59358100  | 1.16869200  |
| H | 7.30445800  | 2.99164000  | 2.10791900  |
| C | 4.42638700  | 0.03141000  | 0.03821200  |
| C | 3.90675700  | -0.64920400 | -1.14390500 |
| C | 3.91199900  | -2.10533400 | -1.12731900 |
| C | 4.43613800  | -2.75489600 | 0.07015300  |
| C | 5.33710700  | -3.87496900 | 0.06832900  |
| C | 5.84906200  | -4.44201800 | 1.26817100  |
| C | 5.94471000  | -4.31492700 | -1.13959900 |
| C | 6.95657600  | -5.27315500 | 1.26130500  |
| H | 5.41851000  | -4.15705000 | 2.22141700  |
| C | 7.06010600  | -5.13385500 | -1.13394100 |
| H | 5.60281300  | -3.90903000 | -2.08506800 |
| C | 7.64545600  | -5.58423200 | 0.06871000  |
| H | 7.33240900  | -5.64653400 | 2.20982400  |
| H | 7.55477600  | -5.33707500 | -2.07884200 |
| C | 3.90663700  | -2.07990800 | 1.25209800  |
| C | 3.19770200  | -2.74838900 | 2.23944900  |
| C | 2.24620600  | -2.06057800 | 3.04448200  |
| C | 2.24089700  | -0.60984400 | 3.02775700  |
| C | 3.18763100  | 0.06609700  | 2.20717600  |
| C | 3.90148600  | -0.61983300 | 1.23543700  |
| C | 1.13931000  | -2.74087900 | 3.57375000  |
| C | 1.12898500  | 0.07436200  | 3.54125400  |
| H | 1.13439400  | -3.82877100 | 3.55357000  |
| H | 3.16294400  | -3.83435100 | 2.22170900  |
| H | 3.14520800  | 1.15109800  | 2.16445200  |
| H | 1.11621200  | 1.16144900  | 3.49628900  |
| C | -0.08135600 | -2.06337800 | 3.78230600  |
| C | -0.08670300 | -0.60707600 | 3.76556300  |
| C | -1.31812200 | 0.06825400  | 3.62814500  |
| H | -1.31360700 | 1.15543400  | 3.58697600  |
| C | -1.30772800 | -2.75076200 | 3.66043000  |
| H | -1.29510200 | -3.83853200 | 3.64401600  |
| C | 3.21365000  | -2.79827500 | -2.10571100 |
| C | 2.26534100  | -2.12931800 | -2.92964800 |
| C | 2.26014100  | -0.67798100 | -2.94614500 |
| C | 3.20360000  | 0.01628900  | -2.13772500 |
| C | 1.16179200  | -2.82148200 | -3.45058700 |
| C | 1.15169600  | -0.00574400 | -3.48253900 |
| C | -0.06273200 | -0.69230400 | -3.69804700 |
| C | -0.05749600 | -2.14871900 | -3.68156200 |
| C | -1.28469000 | -2.83304500 | -3.55155400 |
| H | -1.27245800 | -3.92017000 | -3.51055400 |

## Supporting Information

---

|   |             |             |             |
|---|-------------|-------------|-------------|
| C | -1.29482000 | -0.01403900 | -3.58347300 |
| H | 1.15693500  | -3.90864100 | -3.40643500 |
| H | 3.19223100  | -3.88436100 | -2.07009400 |
| H | 3.17453700  | 1.10273000  | -2.12694200 |
| H | 1.13896700  | 1.08206900  | -3.46287400 |
| H | -1.29031800 | 1.07379300  | -3.56687300 |
| C | -2.43718100 | -2.08066700 | 3.15380000  |
| C | -3.36592900 | -2.77440200 | 2.34506800  |
| C | -3.95905700 | -2.10878800 | 1.25429200  |
| C | -3.96447500 | -0.64817500 | 1.23769700  |
| C | -3.37650100 | 0.04654600  | 2.31296900  |
| C | -2.44259900 | -0.62159600 | 3.13719600  |
| C | -4.17881600 | -2.80399200 | 0.04536300  |
| C | -4.18924900 | 0.01770100  | 0.01328400  |
| C | -3.95668300 | -0.67580900 | -1.19412200 |
| C | -3.95132400 | -2.13643700 | -1.17754500 |
| C | -3.35125200 | -2.82668700 | -2.24913700 |
| H | -3.32626400 | -3.91393700 | -2.22043400 |
| C | -2.41725000 | -2.15156800 | -3.06737000 |
| C | -2.42251400 | -0.69248800 | -3.08389400 |
| C | -3.36144100 | -0.00574100 | -2.28113200 |
| H | -4.14930200 | -3.89139200 | 0.05783600  |
| H | -3.34065100 | -3.86201600 | 2.34121700  |
| H | -3.35943800 | 1.13395100  | 2.28433900  |
| H | -4.16770500 | 1.10529100  | 0.00099800  |
| H | -3.34433700 | 1.08203400  | -2.27711200 |

### Reference

1. S. Muhammad, T. Minami, H. Fukui, K. Yoneda, S. Minamide, R. Kishi, Y. Shigeta and M. Nakano, *Int. J. Quantum Chem*, 2012, **113**, 592-598.
2. H. Iikura, T. Tsuneda, T. Yanai and K. Hirao, *J. Chem. Phys.*, 2001, **115**, 3540-3544.
3. R. Kishi, M. Nakano, S. Ohta, A. Takebe, M. Nate, H. Takahashi, T. Kubo, K. Kamada, K. Ohta, B. Champagne and E. Botek, *J. Chem. Theory Comput.*, 2007, **3**, 1699-1707.
4. S. Ohta, M. Nakano, T. Kubo, K. Kamada, K. Ohta, R. Kishi, N. Nakagawa, B. Champagne, E. Botek, A. Takebe, S.-y. Umezaki, M. Nate, H. Takahashi, S.-i. Furukawa, Y. Morita, K. Nakasuji and K. Yamaguchi, *J. Phys. Chem. A.*, 2007, **111**, 3633-3641.
